# Supplementary material for: High-efficiency catalytic performance over mesoporous Ni/beta zeolite for the synthesis of quinoline from glycerol and aniline
Source: Royal Society of Chemistry journal article supplement (doi:10.1039/c6ra26736j), 2017-01-01
Supplement: c6ra26736j1.pdf [file c6ra26736j1.pdf]

## Supporting information

# High-efficiency catalytic performance over mesoporous Ni/Beta zeolite for synthesis of quinoline from glycerol and aniline

An Li<sup>†</sup>, Chen Huang<sup>†</sup>, Cai-Wu Luo<sup>†</sup>, Wen-Jun Yi<sup>†</sup>,

Zi-Sheng Chao<sup>\*,†</sup>

*<sup>†</sup>College of Chemistry and Chemical Engineering, Key Laboratory of Chemometrics & Chemical Biological Sensing Technologies, Ministry of Education, Hunan University, Changsha, 410082, China*

**\*Corresponding author. Tel & Fax: +86-731-88713257; Email: zschao@yahoo.com**

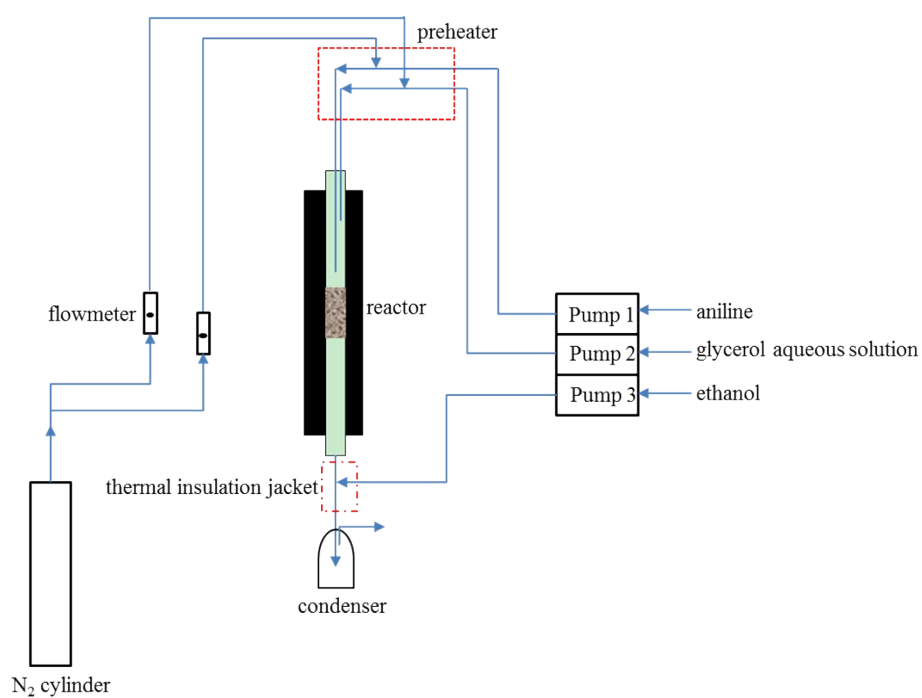

Figure S1. Schematic diagram for the homemade reaction equipment employed in the synthesis of quinoline from aniline and glycerol.

Table S1. The productivity of quinoline in terms of weight time yield.

| catalyst         | Aniline Conversion (%) | Quinoline Yield <sup>a</sup> (%) | quinoline productivity <sup>b</sup> (g·g <sup>-1</sup> ·h <sup>-1</sup> ) |
|------------------|------------------------|----------------------------------|---------------------------------------------------------------------------|
| H $\beta$        | 93.3                   | 50.6                             | 0.09                                                                      |
| Ni/H $\beta$     | 95.0                   | 61.2                             | 0.11                                                                      |
| H $\beta$ -At    | 97.1                   | 55.6                             | 0.10                                                                      |
| Ni/H $\beta$ -At | 96.0                   | 71.4                             | 0.13                                                                      |

<sup>a</sup> mole yield of quinoline.

<sup>b</sup> weight of quinoline produced per gram of catalyst per hour.

Reaction condition: catalyst weight = 1.0 g; LHSV(aniline) = 0.13 h<sup>-1</sup>, reaction temperature = 470 °C; molar ratio of aniline/glycerol = 1/4; concentration of glycerol = 20 wt %; TOS = 2 h.
